# Supplementary material for: Effects of Lipid Saturation on the Surface Properties of Human Meibum Films
Source: PubMed Central journal article supplement (PMC6121396; doi:10.3390/ijms19082209), 2018-07-28

**Supplementary file:** Fourier transformation analysis and Cole-Cole plots of human meibum films with 25-67% of catalytic saturation of the lipid acyl chains

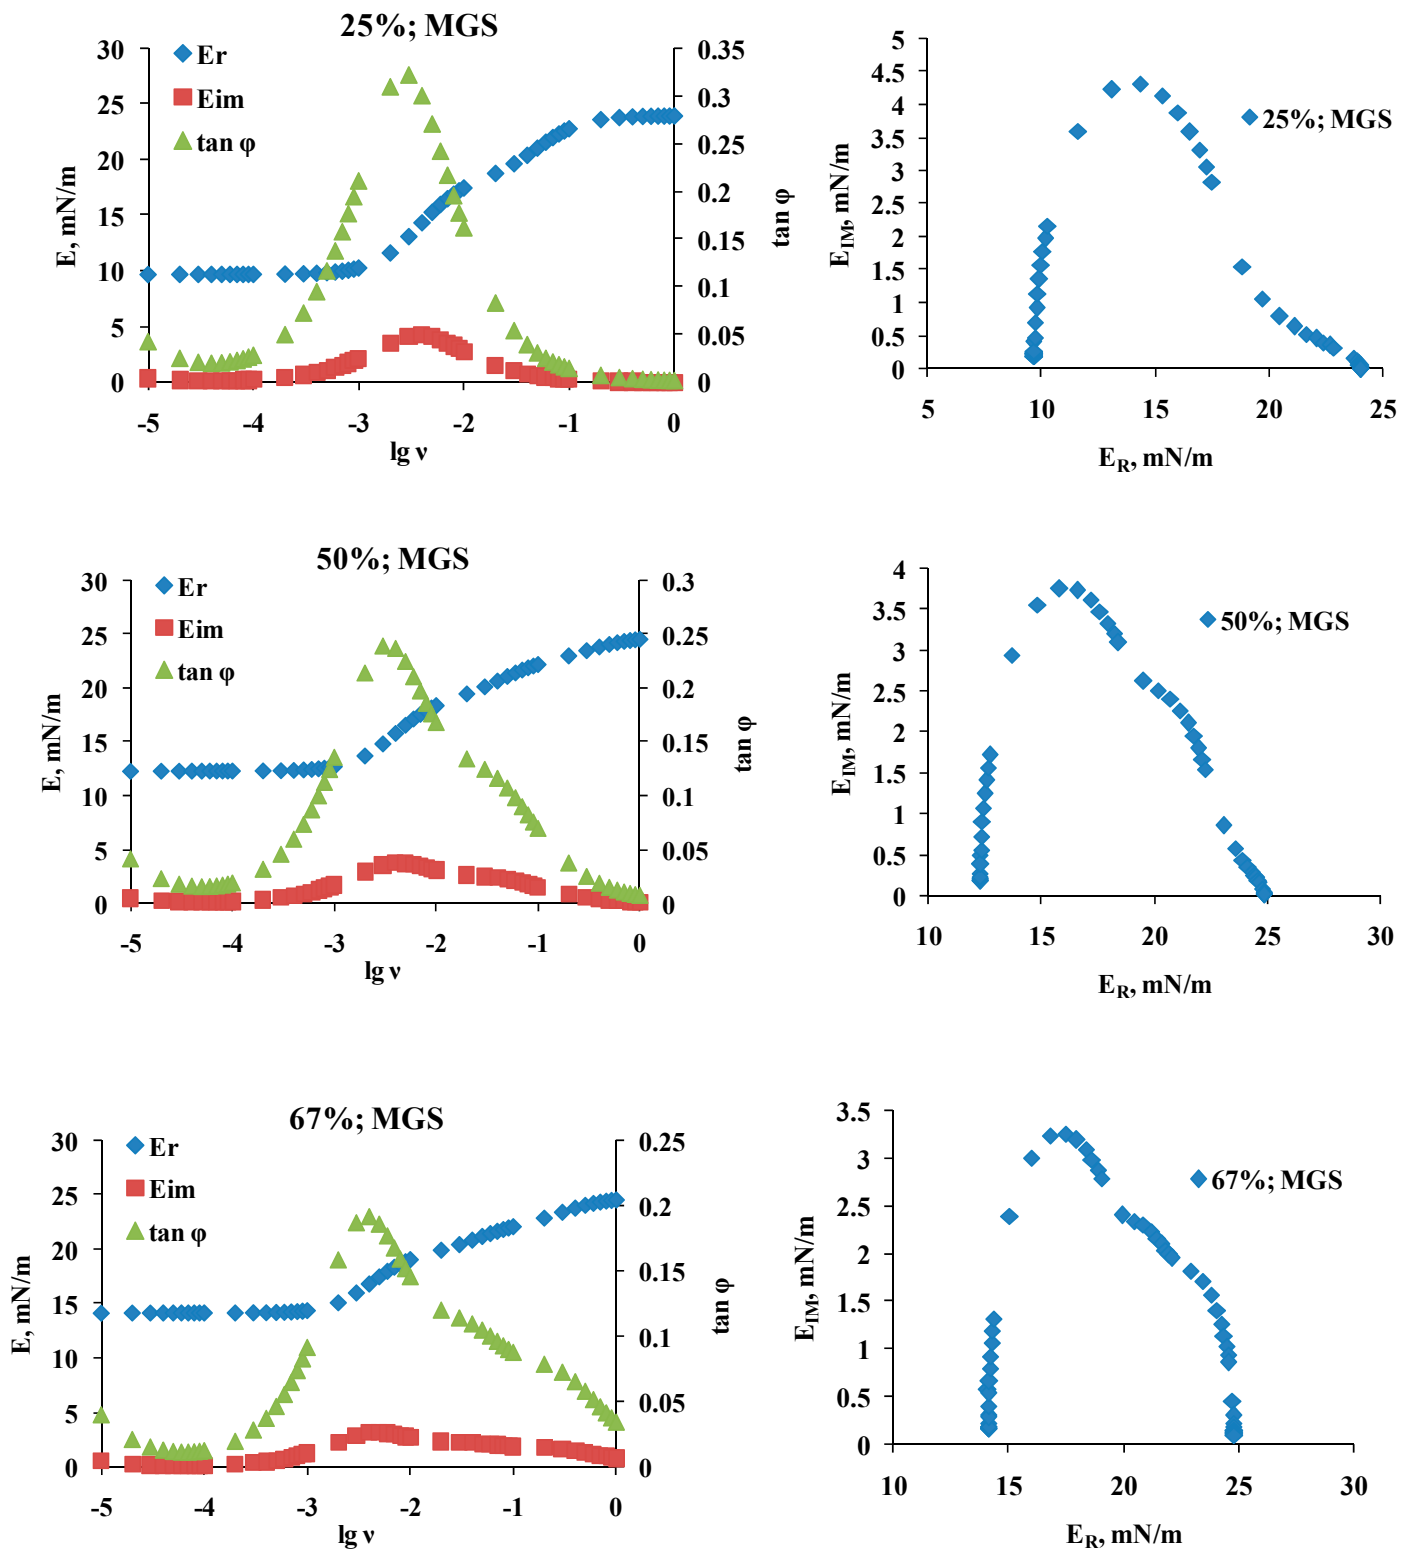

Supplement: ijms-19-02209-s001.pdf [file ijms-19-02209-s001.pdf]
